# Supplementary material for: A double-redox aqueous capacitor with high energy output
Source: Royal Society of Chemistry journal article supplement (doi:10.1039/d2ta09541f), 2023-01-01
Supplement: d2ta09541f1.pdf [file d2ta09541f1.pdf]

*Supporting Information*

# Double redox aqueous capacitor with high energy output

*Adam Slesinski, Sylwia Sroka, Sergio Aina, Justyna Piwek, Krzysztof Fic,*

*Maria Pilar Lobera, Maria Bernechea, Elzbieta Frackowiak*

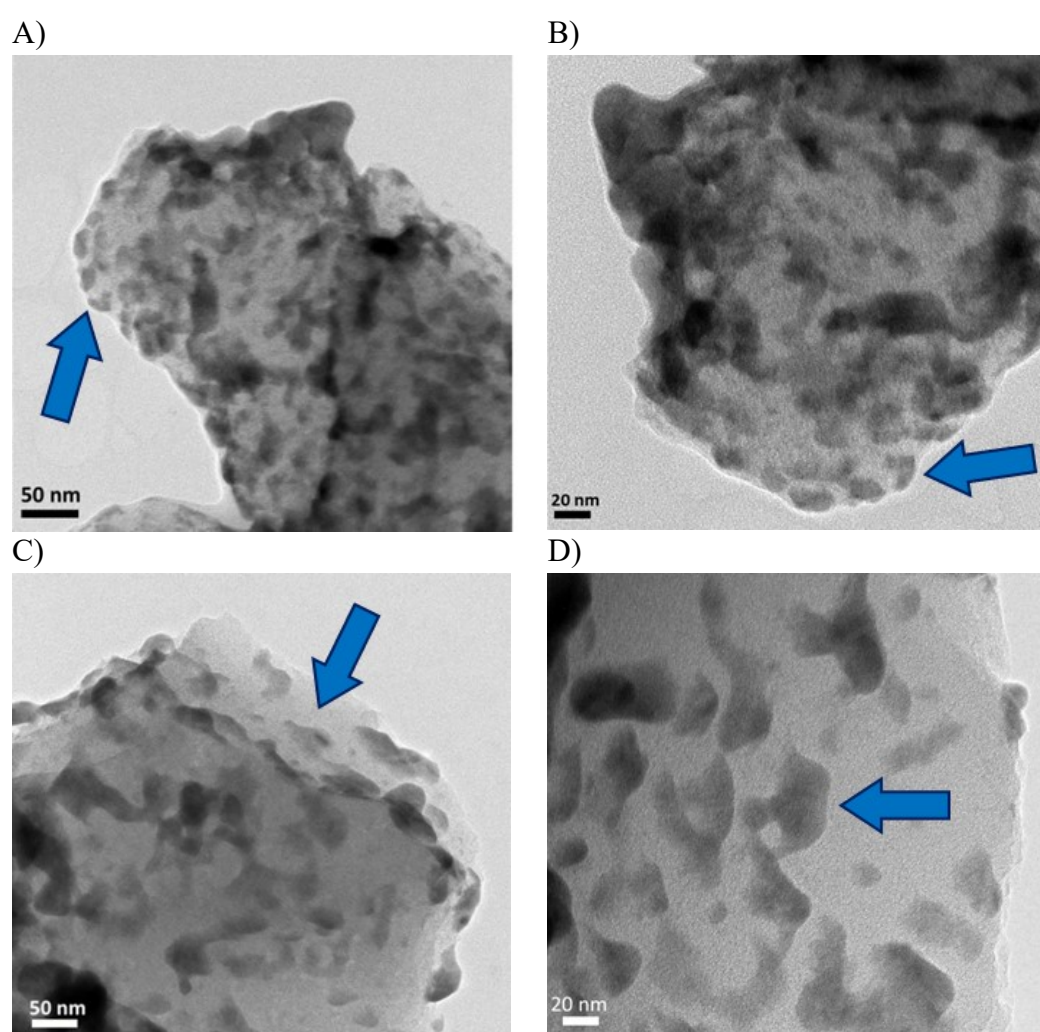

**Figure S1.** A) and B) TEM images of YP50F + 10wt% Bi<sub>2</sub>S<sub>3</sub>. C) and D) TEM images of YP50F + 10wt% Bi<sub>2</sub>S<sub>3</sub> + MPA with 50 nm scale and 20 nm scale. Arrows have been included to indicate the location of Bi<sub>2</sub>S<sub>3</sub> NCs.

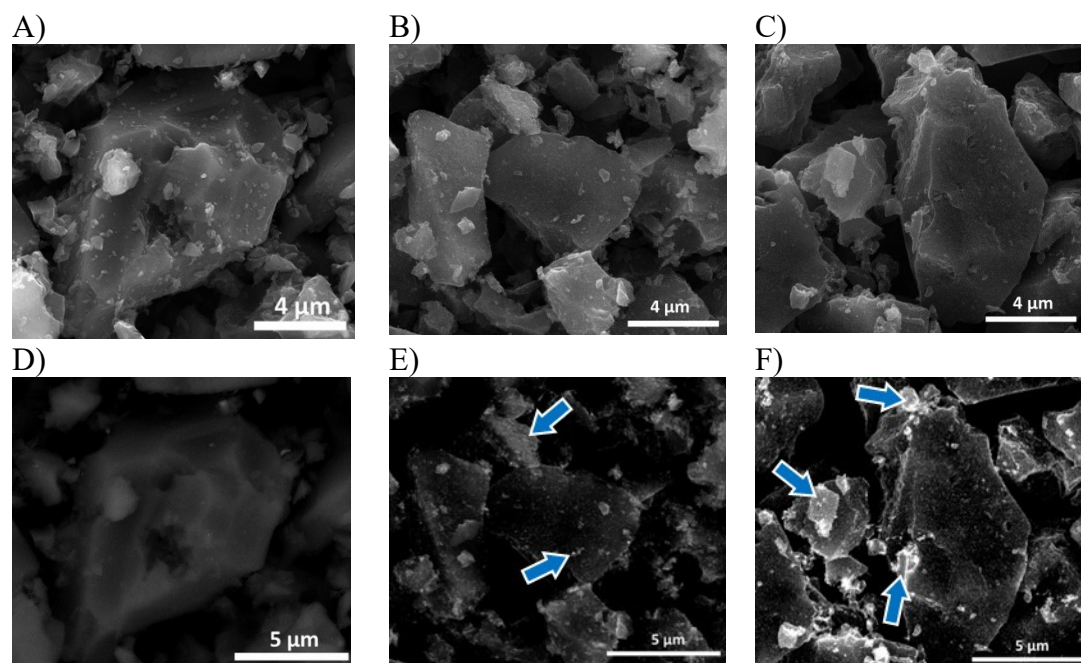

**Figure S2.** SEM images with of A) YP50F, B) YP50F + 5wt%  $\text{Bi}_2\text{S}_3$  and C) YP50F + 10wt%  $\text{Bi}_2\text{S}_3$  with secondary electrons (SE) mode and with back scattered diffraction mode (BSED) (D, E, F respectively) in which heavier elements appear brighter and in our case is related to the presence of  $\text{Bi}_2\text{S}_3$  nanocrystals (scale is 5  $\mu\text{m}$ ). Magnification is  $\times 20000$ . Arrows have been included to indicate the location of  $\text{Bi}_2\text{S}_3$  NCs.

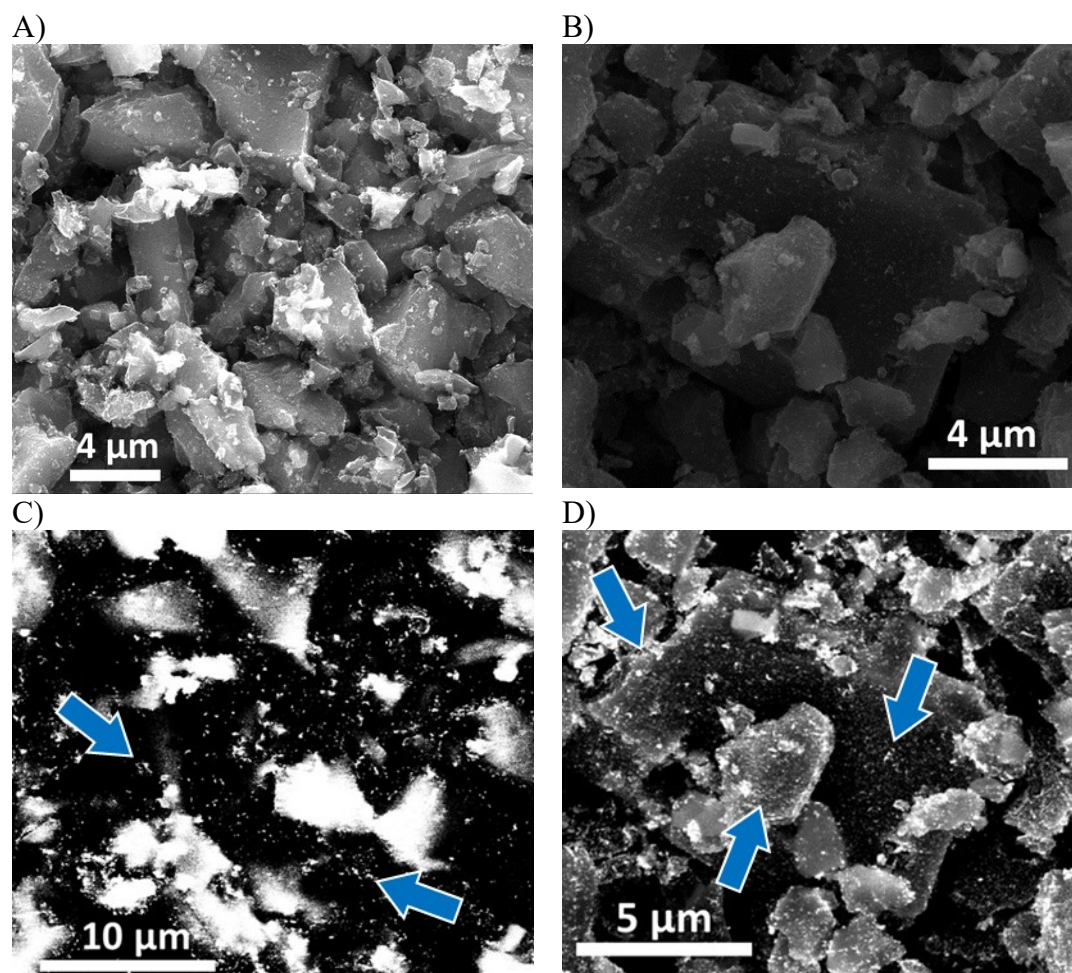

**Figure S3.** SEM images of A) YP50F + 5wt% Bi<sub>2</sub>S<sub>3</sub> + MPA and B) YP50F + 10wt% Bi<sub>2</sub>S<sub>3</sub> + MPA in SE and in BSED mode (C and D respectively). Arrows have been included to indicate the location of Bi<sub>2</sub>S<sub>3</sub> NCs.



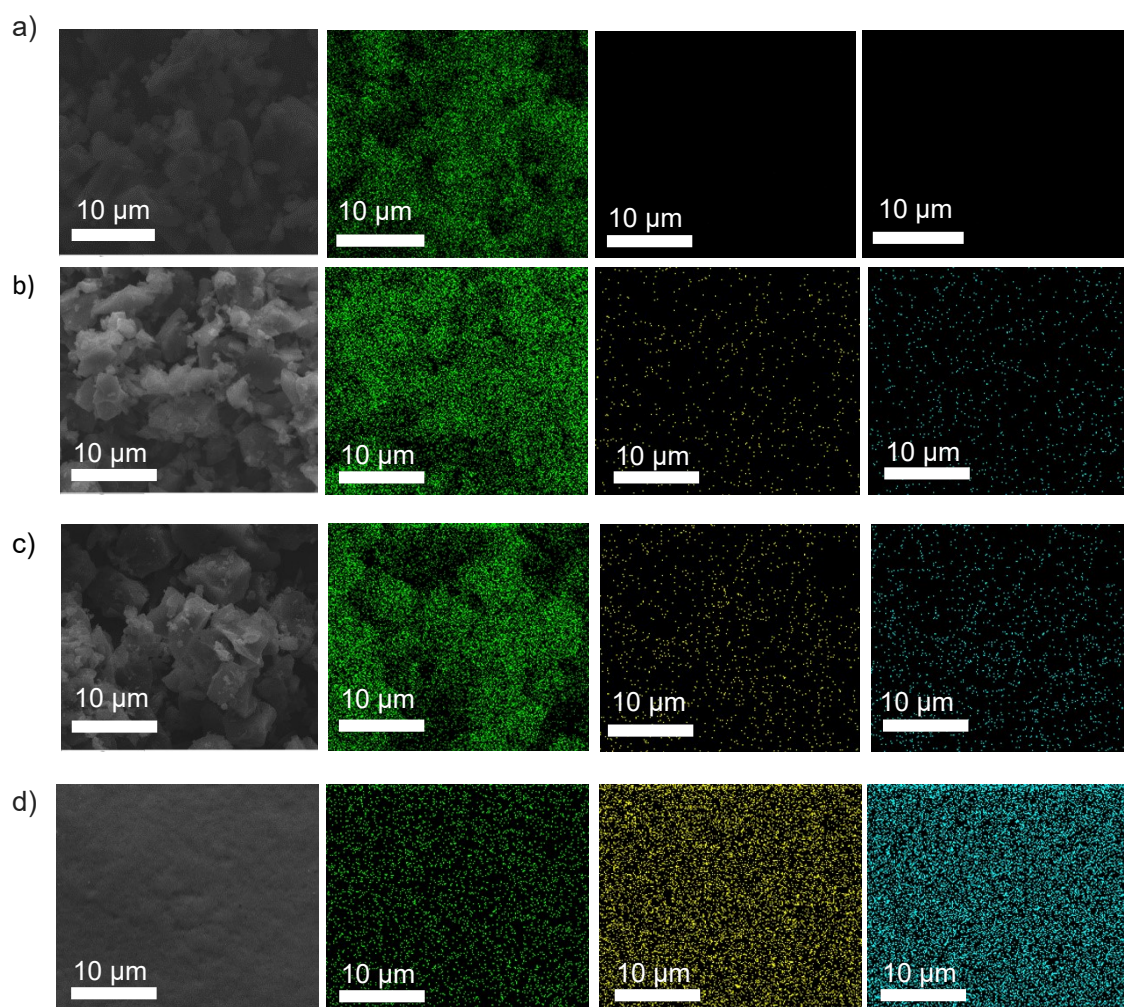

**Figure S4.** SEM-EDS elemental mapping of (a) YP50F, (b) YP50F + 5wt%  $\text{Bi}_2\text{S}_3$ , (c) YP50F + 10wt%  $\text{Bi}_2\text{S}_3$ , and (d) as-synthesized  $\text{Bi}_2\text{S}_3$  NCs. C in green, S in yellow and Bi in blue.

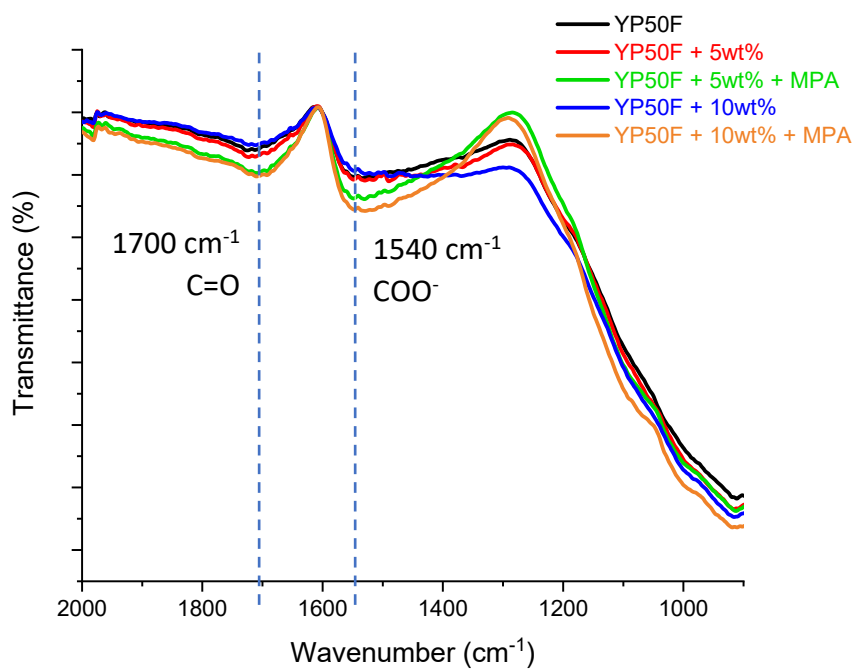

**Figure S5.** FTIR spectra of YP50F (black), YP50F + 5wt%  $\text{Bi}_2\text{S}_3$  (red), YP50F + 10wt%  $\text{Bi}_2\text{S}_3$  (blue), YP50F + 5wt%  $\text{Bi}_2\text{S}_3$  + MPA (green) and YP50F + 10wt%  $\text{Bi}_2\text{S}_3$  + MPA (orange) after 250 scans,  $4\text{ cm}^{-1}$  resolution, from  $900$  to  $2000\text{ cm}^{-1}$ .

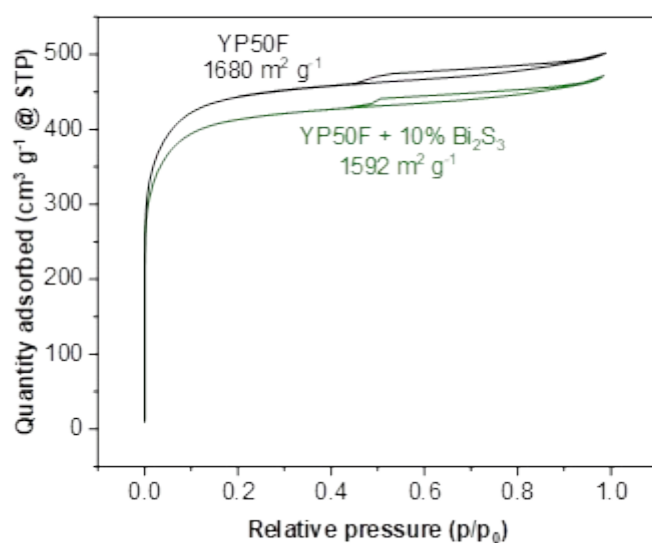

**Figure S6.** Nitrogen adsorption/desorption isotherm at 77K to determine the surface area.

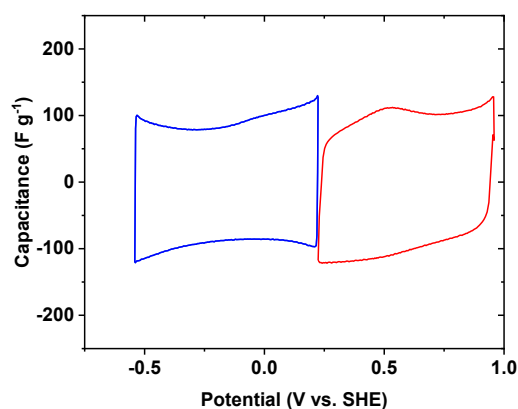

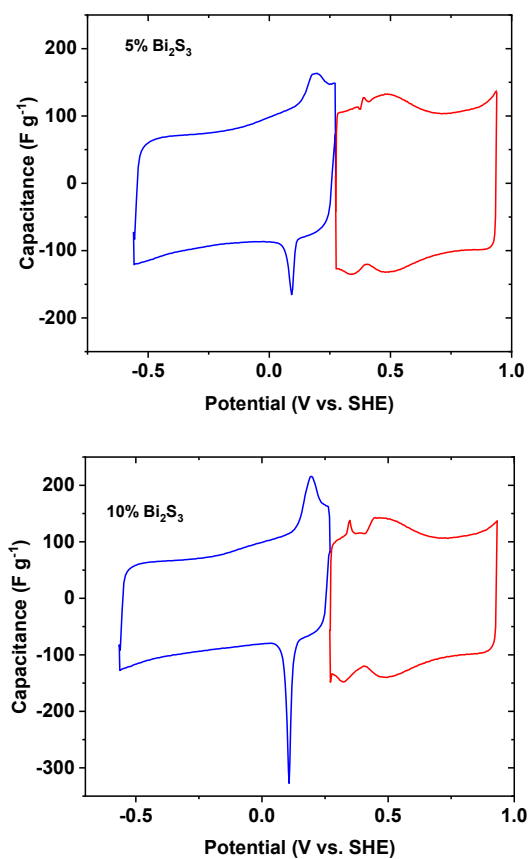

**Figure S7** Electrodes operation voltammetry in YP50F +  $Bi_2S_3$  in 1 M  $Li_2SO_4$  at  $5\ mV\cdot s^{-1}$ . Cell voltage 1.5 V.

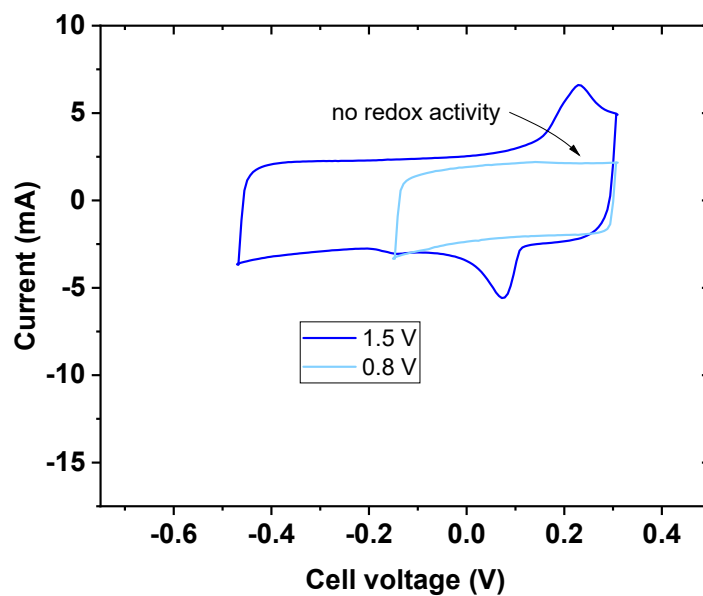

**Figure S8** Negative electrode operation voltammetry in YP50F + 10wt%  $Bi_2S_3$  in 1 M  $Li_2SO_4$  at  $5\ mV\cdot s^{-1}$ . Cell voltage 0.8V and 1.5 V.

**Table S1** Elemental composition of pristine electrode containing 10wt%  $\text{Bi}_2\text{S}_3$  and electrodes from the systems operating at different upper cell voltage limits 0.8 V and 1.5 V.

| <i>Electrode</i>                                                   | <i>N</i>   | <i>C</i>    | <i>H</i>   | <i>S</i>   |
|--------------------------------------------------------------------|------------|-------------|------------|------------|
| <i>YP50F + <math>\text{Bi}_2\text{S}_3</math> pristine</i>         | <i>0.4</i> | <i>85.7</i> | <i>1.0</i> | <i>0.6</i> |
| <i>YP50F + <math>\text{Bi}_2\text{S}_3</math> positive (1.5 V)</i> | <i>0.0</i> | <i>82.6</i> | <i>1.2</i> | <i>0.6</i> |
| <i>YP50F + <math>\text{Bi}_2\text{S}_3</math> negative (1.5 V)</i> | <i>0.6</i> | <i>85.9</i> | <i>1.0</i> | <i>0.1</i> |
| <i>YP50F + <math>\text{Bi}_2\text{S}_3</math> positive (0.8 V)</i> | <i>0.3</i> | <i>82.9</i> | <i>1.0</i> | <i>0.9</i> |
| <i>YP50F + <math>\text{Bi}_2\text{S}_3</math> negative (0.8 V)</i> | <i>0.5</i> | <i>85.9</i> | <i>1.0</i> | <i>0.3</i> |

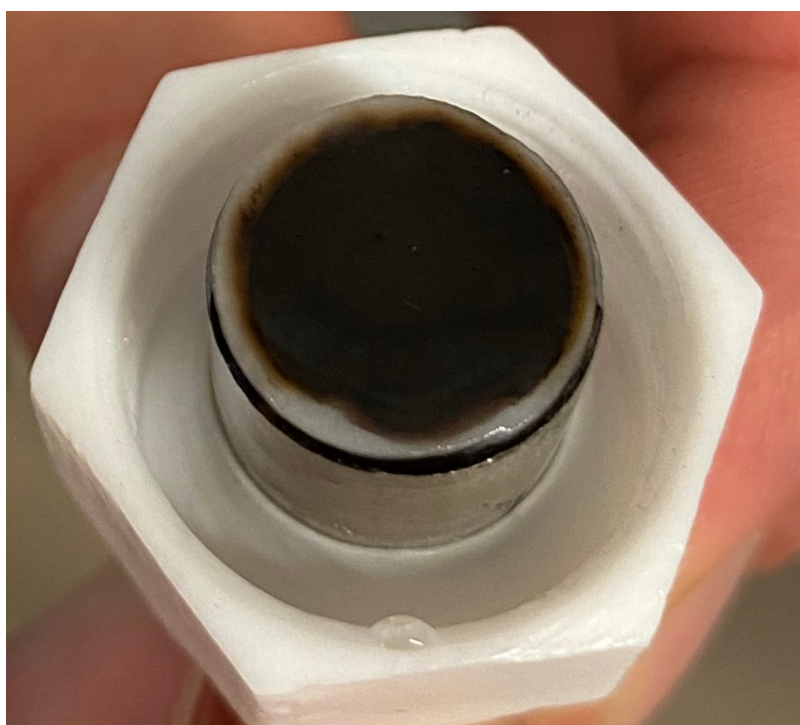

**Figure S9** Metallic deposition of bismuth on glass fiber separator of the cell YP50F +  $\text{Bi}_2\text{S}_3$  in 1 M  $\text{Li}_2\text{SO}_4$  at 1.5 V.

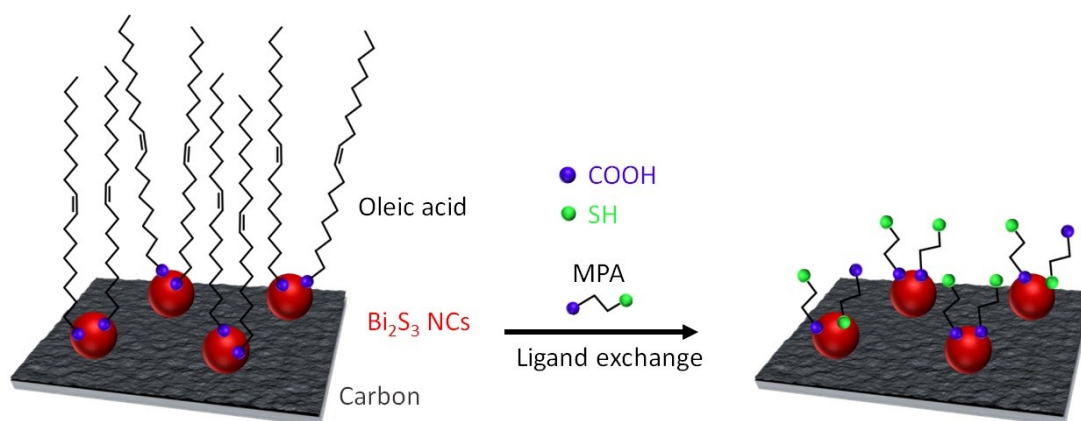

**Figure S10** Scheme of the 3-mercaptopropionic acid (MPA) ligand exchange treatment where MPA molecules substitute the stabilizing oleic acid chains on the surface of the  $\text{Bi}_2\text{S}_3$  nanocrystals. Most of MPA molecules bond to the NCs through the carboxylic acid end. Blue spheres represent carboxylic acid groups and green spheres, thiol groups.

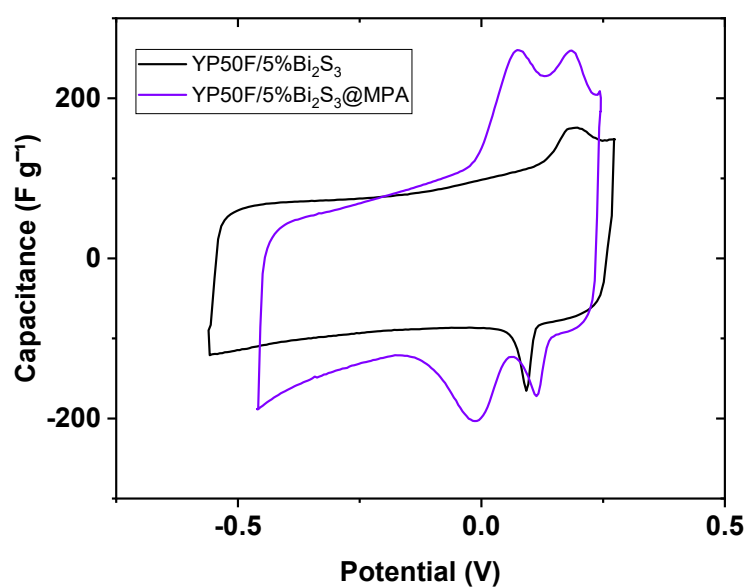

**Figure S11** Comparison of the negative electrode responses in 5wt%  $\text{Bi}_2\text{S}_3$  and 5wt%  $\text{Bi}_2\text{S}_3$  + MPA. (cell polarized to 1.5 V) in 1 M  $\text{Li}_2\text{SO}_4$  at  $2.5 \text{ mV} \cdot \text{s}^{-1}$ .



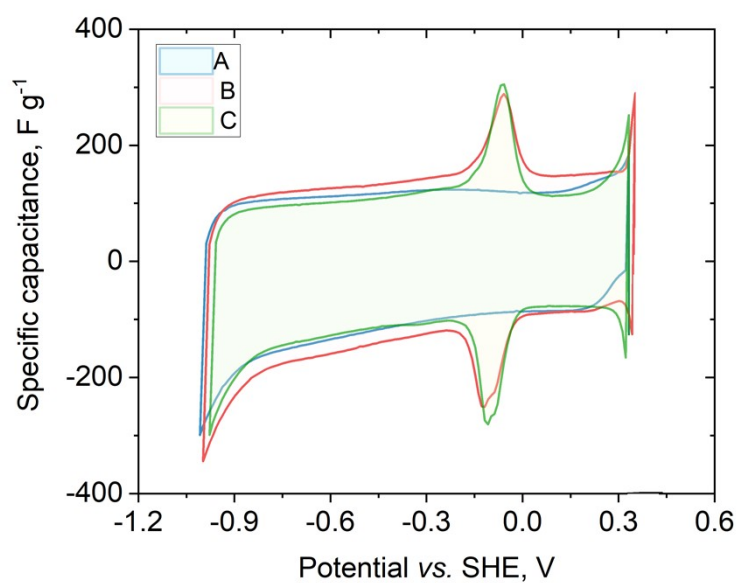

**Figure S12** Specific capacitances calculated from SPECS data of the negative electrode of YP50F (A), 5wt%  $\text{Bi}_2\text{S}_3$  + MPA (B) and 5wt%  $\text{Bi}_2\text{S}_3$  (C) in  $1 \text{ mol L}^{-1}$  NaI with 2:1 electrode mass ratio.

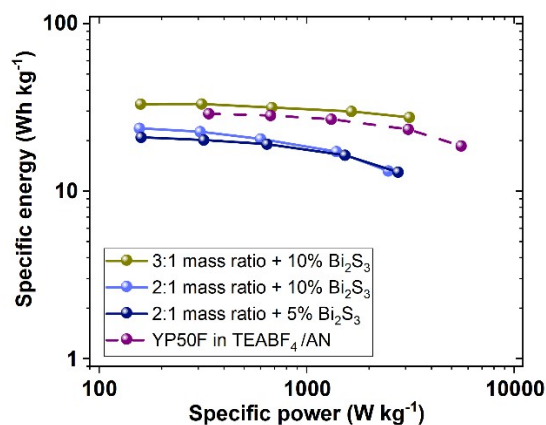

**Figure S13** Ragone plot for different negative-to-positive electrode mass ratios of the systems. Comparison with organic medium. Specific values expressed per mass of both electrodes.

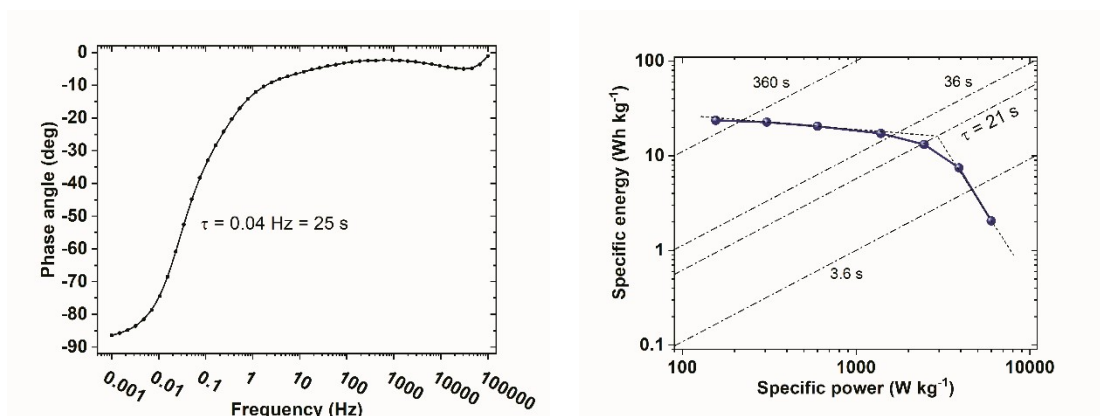

**Figure S14** Bode plot (ac) and Ragone plot (dc) in wide discharge rate spectrum to analytically determine RC time constant.

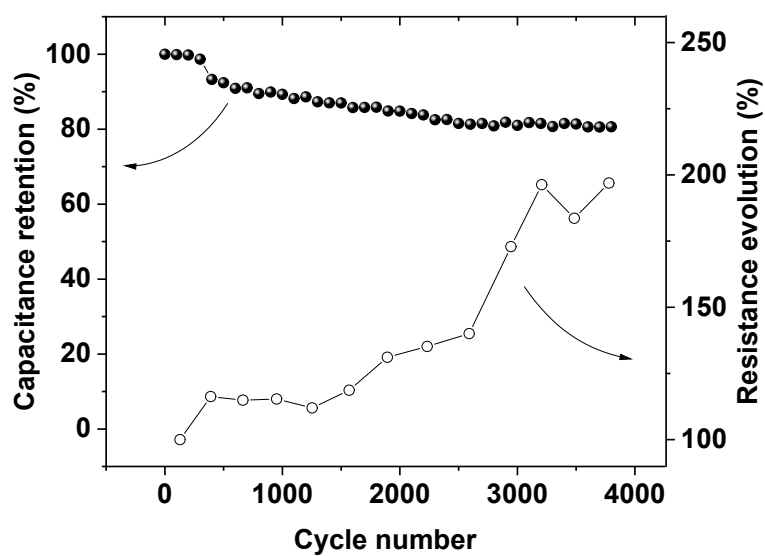

**Figure S15** Cyclability of the system ( $1 \text{ A g}^{-1}$ ) (-) YP50F + 10wt%Bi<sub>2</sub>S<sub>3</sub> + MPA // YP50F (+) ( $1 \text{ mol L}^{-1} \text{ NaI}$ )  $m_-:m_+ = 2:1$ .
